# Supplementary material for: Integrated Transcriptome and Metabolome Analyses Reveal Details of the Molecular Regulation of Resistance to Stem Nematode in Sweet Potato
Source: MDPI journal article supplement (doi:10.3390/plants12102052), 2023-05-22
Supplement: s1 [file s1]

Supplementary Table S1. Quantitative Real-time PCR primer design

| Genes          | L-primer                     | R-primer                     |
|----------------|------------------------------|------------------------------|
| itf10g20620.t1 | TCACTTGGTCTTGGGAAACC         | GCAGAAGACCTGCATCACAA         |
| itf04g08530.t1 | GAGGGAGATGTGATGGGAGA         | CCACCCCTTCCTTAATTTCC         |
| itf14g18430.t1 | AAACCAGATGGCAATGGAAG         | TCAGCAACACTGCAAGCTCT         |
| itf14g17940.t1 | GCCACCTTGTTTCTTTGCAT         | TCTCAGAGACAGCAGCTCCA         |
| itf06g12490.t1 | ATTGGTTCAGGCAGTTTGG          | GCCTTAAAGTCATCGGCAAA         |
| itf10g03250.t1 | GTTGCAGGTCCCTTCCATTA         | TTTCTTGGGGCATTGAAAG          |
| itf12g18840.t1 | ATGAAGTCGATGAGACAGACACA      | ATCTGGATAACACCCTGAGGATT      |
| Actin          | AGCAGCATGAAGATTAAGGTTGTAGCAC | TGGAAAATTAGAAGCACTTCCTGTGAAC |

Supplementary Table S2. Annotation of metabolites in correlation network diagram (Fig. 6).

| Index          | Name                                                      | Index          | Name                     |
|----------------|-----------------------------------------------------------|----------------|--------------------------|
| M84T352_POS    | l-Aminocyclopropanecarboxylic acid                        | M159T326_NEG   | 2-Oxoadipic acid         |
| M291T426_POS   | Argininosuccinic acid                                     | M173T436_NEG   | Cis-aconitate            |
| M277T54_POS    | cis-9-Palmitoleic acid                                    | M129T437_2_NEG | Citraconic acid          |
| M131T220_POS   | Coniferyl alcohol                                         | M115T200_NEG   | Fumarate                 |
| M539T68_POS    | Cucurbitacin d                                            | M583T161_NEG   | Gambogic acid            |
| M228T166_POS   | Deoxycytidine                                             | M116T299_NEG   | Indole                   |
| M375T496_POS   | Glu-Ala-Arg                                               | M129T61_NEG    | Ketoleucine              |
| M613T495_POS   | Glutathione, oxidized                                     | M279T37_NEG    | Linoleic acid            |
| M117T333_POS   | Succinamide                                               | M147T257_NEG   | Mevalonic acid           |
| M149T221_POS   | trans-Cinnamate                                           | M433T175_NEG   | Naringenin-7-o-glucoside |
| M352T99_POS    | trans-Zeatin-riboside                                     | M88T343_NEG    | Sarcosine                |
| M338T355_2_POS | Tyr-Arg                                                   | M187T263_NEG   | Val-Ala                  |
| M120T247_POS   | Tyramine                                                  | M302T193_NEG   | Val-Trp                  |
| M599T246_NEG   | 1-Octadecanoyl-sn-glycero-3-phospho-<br>(l'-myo-inositol) |                |                          |
