# Supplementary material for: Integrated Transcriptome and Metabolome Analyses Reveal Details of the Molecular Regulation of Resistance to Stem Nematode in Sweet Potato
Source: Plants (Basel). 2023 May 22;12(10):2052. doi: 10.3390/plants12102052 (PMC10221022; doi:10.3390/plants12102052)
Supplement: Supplementary file 1 [file plants-12-02052-s001.zip]

Archive with 11 entries (11 files):
- Supplementary Fig/Supplementary Fig. S1.png
- Supplementary Fig/Supplementary Fig. S2.png
- Supplementary Fig/Supplementary Fig. S3.png
- Supplementary Fig/Supplementary Fig. S4.jpg
- Supplementary Fig/Supplementary Fig. S5.png
- Supplementary Fig/Supplementary Fig. S6.png
- Supplementary Fig/Supplementary Fig. S7.jpg
- Supplementary Fig/Supplementary Fig. S8.png
- Supplementary Fig/Supplementary Fig. S9.png
- Supplementary Figure legends.pdf
- Supplementary Table S1 and Supplementary Table S2.pdf
